# Supplementary material
Source: Springer Nature journal article supplement (https://www.springermedizin.de/resource/supplementary/13075_2009_2773_MOESM3_ESM.pdf/9692856)

Study Country OR (95% CI) Weight

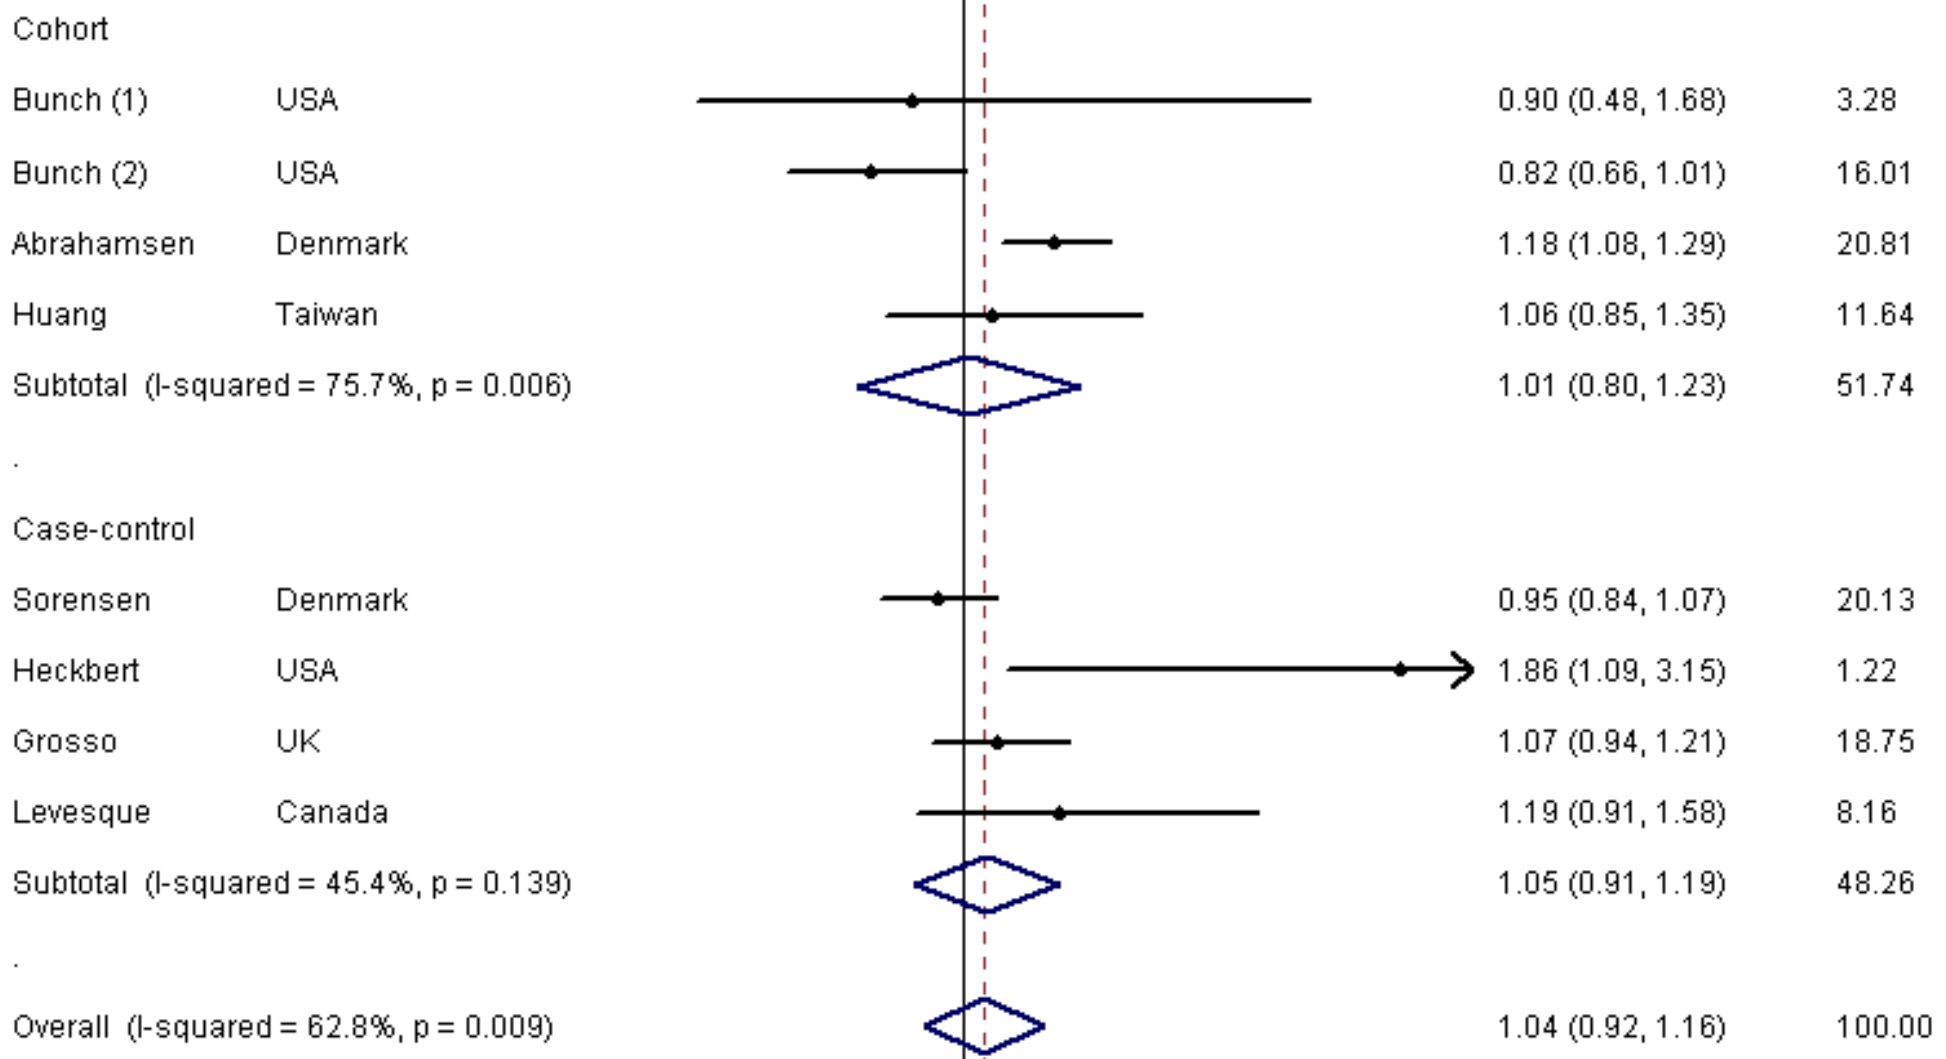

NOTE: Weights are from random effects analysis

0

1

2

no AF

AF

Supplement: MOESM3 [file 9692856]
